# Supplementary material
Source: Research Square preprint supplement (doi:10.21203/rs.3.rs-6479274/v2)
Supplement: Supplementary file 1 [file 6504365ae880498699b85c4f.docx]

**Supplemental Methods**

Representative confocal images in figures

- [In FIJI] Import Z-stack ND2 file 🡪 Z-project 🡪 Autoscale 🡪 Add scale bar 🡪 Individual channels and fluorescent merge saved as jpeg files
- [In PowerPoint] Import JPEG 🡪 +20% brightness
- [In IMARIS] Import Z-stack ND2 file 🡪 Process image 🡪 Deconvolve 🡪 Normal shading filter 🡪 Volume view

TNT identification and measurement in confocal images

- [In ICY] Import Z-stack ND2 file into ICY manual TNT plugin 🡪 Mark TNTs presented in contrast, use the tool to track numbers
- [In FIJI] Manually measure all TNTs identified in FIJI using line tool 🡪 Collect numeric data for analysis in GraphPad Prism (GPP)

Co-expression analysis in confocal images

- [In FIJI] Import Z-stack ND2 file 🡪 Z-project 🡪 Autoscale 🡪 Subtract background 🡪 Plot intensity profile of each channel (line or ROI) 🡪 Collect numeric data for correlation analysis in GPP

Image total cell counts in confocal images

- [In FIJI] Import Z-stack ND2 file 🡪 Select channel that highlights individual cells 🡪 Z-project 🡪 Subtract background 🡪 Median filter 🡪 Make binary 🡪 Despeckle 🡪 3D OC object counter 🡪 Threshold 100, size exclusion 200 – 5000μm, select show objects and statistics

Mitochondrial Quantification

- [Cytation 5 imaging_Gen5 analysis Software]
  - Cell count DAPI-positive objects 🡪 Add subpopulation (DAPI+ threshold / Texas Red threshold ) 🡪 Normalize values to timepoint 0
- [Confocal imaging_IMARIS analysis Software]
  - Import and convert ND2 file using imaris converter 🡪 Add surface in DAPI channel 🡪 Surface details 0.414µm 🡪 Machine learning segmentation (all channels) 🡪 Split objects (seed point diameter set to smallest nucleus in sample) 🡪 Statistics 🡪 Specific values 🡪 Intensity mean of mitochondria channel (AF546) 🡪 Save surface creation parameters for batch
  - Repeat for other images using the saved surface 🡪 Adjust surface wrapping as necessary
